# Supplementary material for: Dynamic metabolic responses of brown planthoppers towards susceptible and resistant rice plants
Source: PubMed Central journal article supplement (PMC5595709; doi:10.1111/pbi.12721), 2017-04-13
Supplement: PBI-15-1346-s001.pdf [file PBI-15-1346-s001.pdf]

# Supplementary information

## Dynamic metabolic responses of brown planthoppers towards susceptible and resistant rice plants

*Caixiang Liu<sup>1,†</sup>, Ba Du<sup>3,†</sup>, Fuhua Hao<sup>1</sup>, Hehua Lei<sup>1</sup>, Qianfen Wan<sup>1,2</sup>, Guangcun He<sup>3</sup>, Yulan Wang<sup>1,4\*</sup> and Huiru Tang<sup>1,2\*</sup>*

<sup>1</sup>CAS Key Laboratory of Magnetic Resonance in Biological Systems, State Key Laboratory of Magnetic Resonance and Atomic and Molecular Physics, National Centre for Magnetic Resonance in Wuhan, Wuhan Institute of Physics and Mathematics, the Chinese Academy of Sciences, Wuhan 430071, China

<sup>2</sup>State Key Laboratory of Genetic Engineering, Zhongshan Hospital and School of Life Sciences, Fudan University, Collaborative Innovation Center for Genetics and Development, Metabonomics and Systems Biology Laboratory at Shanghai International Centre for Molecular Phenomics, Shanghai, 200438, China

<sup>3</sup>State Key Laboratory of Hybrid Rice, College of Life Sciences, Wuhan University, Wuhan 430072, China

<sup>4</sup>Collaborative Innovation Center for Diagnosis and Treatment of Infectious Diseases, Zhejiang University, Hangzhou 310058, China

\*To whom all correspondence should be addressed:

Huiru Tang: Tel, +86-21-51630725; fax, +86-21-51630381; Email, [huiru\\_tang@fudan.edu.cn](mailto:huiru_tang@fudan.edu.cn)

Yulan Wang: Tel, +86-27-87197143; fax, +86-27-87199291; Email, [yulan.wang@wipm.ac.cn](mailto:yulan.wang@wipm.ac.cn)

<sup>†</sup>These authors contributed equally to this work.

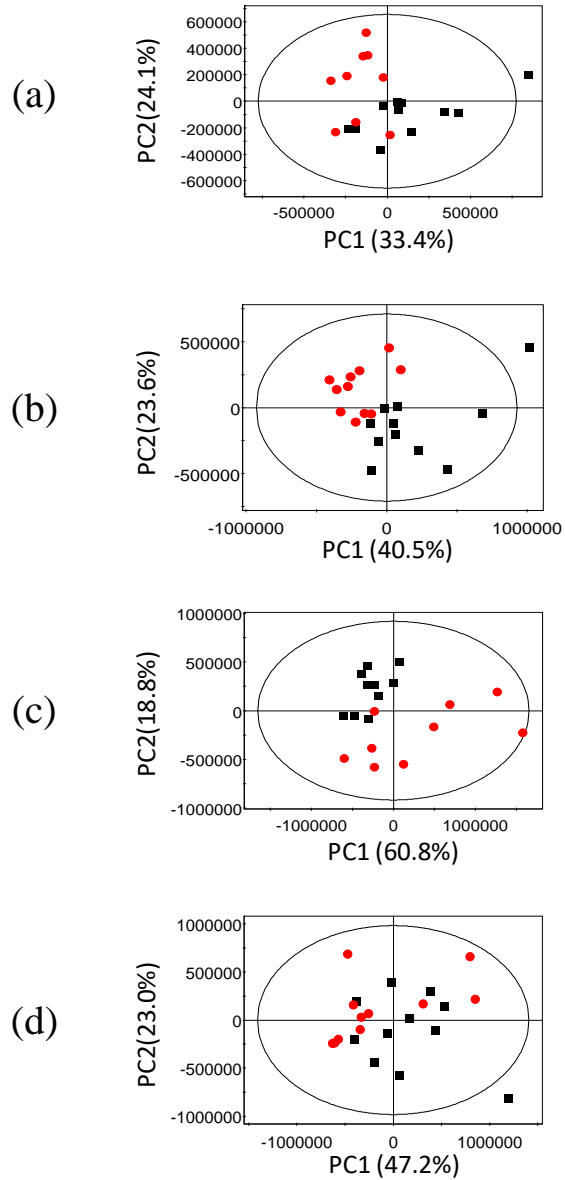

**Figure S1.** PCA scores plots between BPH nymphs feeding on the resistant rice plants (●) and ones feeding on the susceptible lines (■) for (a) 12 hours, (b) 24 hours, (c) 48 hours and (d) 96 hours.

**Table S1.** Assignments of NMR data for metabolites in BPH nymphs feeding on the resistant and susceptible rice plants

| no. | metabolites                    | assignments           | $\delta^1\text{H}$ (ppm) | $\delta^{13}\text{C}$ (ppm) |
|-----|--------------------------------|-----------------------|--------------------------|-----------------------------|
| 1   | Isoleucine (Ile)               | $\delta\text{-CH}_3$  | 0.94 (t) <sup>a</sup>    | 13.9                        |
|     |                                | $\gamma\text{'-CH}_3$ | 1.01 (d)                 | 17.4                        |
|     |                                | $\beta\text{-CH}$     | 1.99 (m)                 | 38.9                        |
| 2   | Leucine (Leu)                  | $\delta\text{'-CH}_3$ | 0.96 (d)                 | ND <sup>b</sup>             |
|     |                                | $\delta\text{-CH}_3$  | 0.97 (d)                 | 26.6                        |
|     |                                | $\beta\text{-CH}_2$   | 1.72 (m)                 | 42.8                        |
| 3   | Valine (Val)                   | $\gamma\text{'-CH}_3$ | 1.04 (d)                 | 20.7                        |
|     |                                | $\gamma\text{-CH}_3$  | 0.99 (d)                 | 19.5                        |
|     |                                | $\beta\text{-CH}$     | 2.27 (m)                 | 31.7                        |
|     |                                | $\alpha\text{-CH}$    | 3.61 (d)                 | 63.2                        |
| 4   | 2-ketoisovalerate              | $\delta\text{-CH}_3$  | 1.13 (d)                 | 19.3                        |
|     |                                | $\gamma\text{-CH}$    | 3.04 (dq)                | 38.8                        |
| 5   | 3-methylaspartate              | $\delta\text{-CH}_3$  | 1.11 (d)                 | 19.1                        |
|     |                                | $\gamma\text{-CH}$    | 2.95 (m)                 | 42.7                        |
|     |                                | $\beta\text{-CH}$     | 4.00 (d)                 | 66.1                        |
| 6   | Threonine (Thr)                | $\gamma\text{-CH}_3$  | 1.33 (d)                 | 20.0                        |
|     |                                | $\beta\text{-CH}$     | 4.24 (m)                 | 68.4                        |
|     |                                | $\alpha\text{-CH}$    | 3.60 (d)                 | 62.7                        |
| 7   | 2-Hydroxyisobutyrate           | $\beta\text{-CH}_3$   | 1.37 (s)                 | 28.9                        |
| 8   | Lysine (Lys)                   | $\gamma\text{-CH}_2$  | 1.45 (m)                 | 24.0                        |
|     |                                | $\delta\text{-CH}_2$  | 1.73 (m)                 | 29.5                        |
|     |                                | $\beta\text{-CH}_2$   | 1.92 (m)                 | 33.2                        |
| 9   | Alanine (Ala)                  | $\beta\text{-CH}_3$   | 1.48 (d)                 | 19.2                        |
|     |                                | $\alpha\text{-CH}$    | 3.78 (q)                 | 53.8                        |
|     |                                | COOH                  |                          | 178.8                       |
| 10  | Arginine (Arg)                 | $\delta\text{-CH}_2$  | 3.24 (t)                 | 42.5                        |
|     |                                | $\gamma\text{-CH}_2$  | 1.66 (m)                 | 24.5                        |
|     |                                | $\beta\text{-CH}_2$   | 1.92 (m)                 | 29.5                        |
|     |                                | $\alpha\text{-CH}$    | 3.78 (t)                 | 57.5                        |
| 11  | Acetate                        | $\beta\text{-CH}_3$   | 1.92 (s)                 | 26.3                        |
| 12  | Proline (Pro)                  | $\delta\text{-CH}$    | 3.37 (t), 3.41 (t)       | 50.0                        |
|     |                                | $\gamma\text{-CH}_2$  | 2.02 (m), 2.08 (m)       | 26.7                        |
|     |                                | $\beta\text{-CH}$     | 2.36 (m)                 | 32.5                        |
|     |                                | $\alpha\text{-CH}$    | 4.14 (t)                 | 65.0                        |
| 13  | $\gamma$ -aminobutyrate (GABA) | $\gamma\text{-CH}_2$  | 3.02 (t)                 | 41.3                        |
|     |                                | $\beta\text{-CH}_2$   | 1.90 (quintet)           | 26.6                        |

|    |                                         |                                     |           |       |
|----|-----------------------------------------|-------------------------------------|-----------|-------|
| 14 | $\alpha$ -Ketoglutarate ( $\alpha$ -KG) | $\alpha$ -CH <sub>2</sub>           | 2.30 (t)  | 37.0  |
|    |                                         | $\gamma$ -CH <sub>2</sub>           | 3.02 (t)  | 38.9  |
|    |                                         | $\beta$ -CH <sub>2</sub>            | 2.44 (t)  | 33.5  |
| 15 | Pyruvate                                | $\beta$ -CH <sub>3</sub>            | 2.38 (s)  | 32.0  |
| 16 | Succinate                               | $\alpha$ , $\beta$ -CH <sub>2</sub> | 2.41 (s)  | 37.3  |
|    |                                         | COOH                                |           | 184.6 |
| 17 | Glutamine (Gln)                         | $\gamma$ -CH <sub>2</sub>           | 2.45 (m)  | 33.9  |
|    |                                         | $\beta$ -CH <sub>2</sub>            | 2.14 (m)  | 29.4  |
|    |                                         | $\alpha$ -CH                        | 3.78 (dd) | 57.2  |
| 18 | Glutamate (Glu)                         | $\gamma$ -CH <sub>2</sub>           | 2.35(m)   | 36.2  |
|    |                                         | $\beta$ -CH                         | 2.13(m)   | 29.1  |
|    |                                         | $\beta'$ -CH                        | 2.06 (m)  | 29.1  |
|    |                                         | $\alpha$ -CH                        | 3.76 (dd) | 57.6  |
| 19 | Dimethylamine                           | N-CH <sub>3</sub>                   | 2.76 (s)  | 47.4  |
| 20 | Asparate (Asp)                          | $\beta$ -CH                         | 2.68 (dd) | 37.0  |
|    |                                         | $\beta'$ -CH                        | 2.82 (dd) | 37.0  |
| 21 | Asparagine (Asn)                        | $\beta'$ -CH                        | 2.96 (dd) | 37.2  |
|    |                                         | $\beta$ -CH                         | 2.86 (dd) | 37.2  |
|    |                                         | $\alpha$ -CH                        | 4.01 (dd) | 54.3  |
|    |                                         | COOH                                |           | 176.5 |
| 22 | Ethanolamine (EA)                       | N-CH <sub>2</sub>                   | 3.15 (t)  | 43.8  |
|    |                                         | O-CH <sub>2</sub>                   | 3.83 (t)  | 60.7  |
| 23 | Choline                                 | N-(CH <sub>3</sub> ) <sup>+</sup>   | 3.20 (s)  | 56.6  |
|    |                                         | $\beta$ -CH <sub>2</sub>            | 3.52 (m)  | 70.0  |
|    |                                         | $\alpha$ -CH <sub>2</sub>           | 4.07 (m)  | 57.9  |
| 24 | Glycerophosphocholine (GPC)             | N-(CH <sub>3</sub> ) <sup>+</sup>   | 3.23 (s)  | 56.9  |
|    |                                         | $\beta$ -CH <sub>2</sub>            | 3.68 (m)  | 62.1  |
|    |                                         | $\alpha$ -CH <sub>2</sub>           | 4.33 (m)  | 62.2  |
| 25 | Glycine (Gly)                           | $\alpha$ -CH                        | 3.57 (s)  | 44.0  |
| 26 | $\beta$ -Glucose                        | C1H                                 | 4.65 (d)  | 98.8  |
|    |                                         | C2H                                 | 3.25 (t)  | 77.1  |
|    |                                         | C3H                                 | 3.49 (t)  | 78.7  |
|    |                                         | C4H                                 | 3.41 (dd) | 72.5  |
|    |                                         | C6H                                 | 3.90      | 63.7  |
|    |                                         | C6'H                                | 3.75      | 63.8  |
| 27 | $\alpha$ -Glucose                       | C1H                                 | 5.24 (d)  | 94.8  |
|    |                                         | C2H                                 | 3.53      | 74.2  |
|    |                                         | C3H                                 | 3.70      | 75.6  |
|    |                                         | C6H                                 | 3.83      | 63.4  |
| 28 | Trehalose                               | C1H                                 | 5.20 (d)  | 96.0  |
|    |                                         | C2H                                 | 3.66 (q)  | 78.5  |
|    |                                         | C3H                                 | 3.86 (dd) | 76.0  |
| 29 | Fumarate                                | $\alpha$ , $\beta$ -C=C             | 6.52 (s)  | 138.1 |
|    |                                         | COOH                                |           | 177.4 |

|    |                                                            |                |           |       |
|----|------------------------------------------------------------|----------------|-----------|-------|
| 30 | Tyrosine (Tyr)                                             | C2, 6H, ring   | 7.19 (d)  | 133.8 |
|    |                                                            | C3, 5H, ring   | 6.90 (d)  | 118.5 |
| 31 | Phenylalanine (Phe)                                        | C2, 6, ring    | 7.33 (m)  | 131.8 |
|    |                                                            | C3, 5, ring    | 7.43 (d)  | 131.8 |
|    |                                                            | C4, ring       | 7.38 (m)  | 130.8 |
|    |                                                            | COOH           |           | 178.4 |
| 32 | Tryptophan (Trp)                                           | C7H, ring      | 7.53 (d)  | 114.8 |
|    |                                                            | C6H, ring      | 7.28 (t)  | 124.8 |
|    |                                                            | C5H, ring      | 7.20 (t)  | 122.1 |
|    |                                                            | C4H, ring      | 7.73 (d)  | 121.3 |
|    |                                                            | C2H, ring      | 7.33 (s)  | 127.1 |
| 33 | Formate                                                    | HCOO-          | 8.46 (s)  | ND    |
| 34 | Adenosine monophosphate (AMP)                              | C2H            | 8.61 (s)  | ND    |
|    |                                                            | C8H            | 8.27 (s)  | ND    |
|    |                                                            | C1H of ribose  | 6.14 (d)  | 89.9  |
|    |                                                            | C2H of ribose  | 4.51 (m)  | 73.5  |
| 35 | Adenosine diphosphate (ADP) / Adenosine triphosphate (ATP) | C3H of ribose  | 4.37 (m)  | 87.6  |
|    |                                                            | C2H            | 8.54 (s)  | ND    |
|    |                                                            | C8H            | 8.27 (s)  | ND    |
| 36 | Uridine monophosphate (UMP)                                | C1H of ribose  | 5.99 (d)  | 90.9  |
|    |                                                            | C3H of ribose  | 4.43 (t)  | 73.0  |
|    |                                                            | C2H of ribose  | 4.34 (t)  | 72.3  |
| 37 | Cytidine monophosphate (CMP)                               | C-CH           | 8.10 (d)  | ND    |
|    |                                                            | N-CH           | 6.14 (d)  | ND    |
|    |                                                            | C2H of ribose  | 6.01 (d)  | 92.3  |
| 38 | Uridine diphosphate glucose (UDP-Glucose)                  | N-CH           | 7.96 (d)  | ND    |
|    |                                                            | C-CH           | 5.97 (d)  | ND    |
|    |                                                            | C1H of glucose | 5.62 (m)  | 80.4  |
| 39 | Guanosine                                                  | C8H            | 8.01 (s)  | 145.3 |
| 40 | Inosine                                                    | C2H            | 8.35 (s)  | 143.0 |
|    |                                                            | C8H            | 8.24 (s)  | 149.5 |
|    |                                                            | C1H of ribose  | 6.10 (d)  | 90.8  |
|    |                                                            | C3H of ribose  | 4.44 (dd) | 73.6  |
|    |                                                            | C4H of ribose  | 4.29 (m)  | 73.6  |
| 41 | Nicotinamide adenine dinucleotide (NAD)                    | C2H            | 9.34 (s)  | ND    |
|    |                                                            | C6H            | 9.15 (d)  | ND    |
|    |                                                            | C4H            | 8.83(d)   | ND    |
|    |                                                            | C2H of adenine | 8.43 (s)  | ND    |
|    |                                                            | C8H            | 8.17 (s)  | ND    |
| 42 | Uridine                                                    | N-CH of uracil | 7.88 (d)  | 144.5 |
|    |                                                            | C-CH of uracil | 5.92 (d)  | 92.3  |
|    |                                                            | C2H of ribose  | 5.90 (d)  | 105.1 |
| 43 | Allanotoin                                                 | CH             | 5.39 (s)  | ND    |
| 44 | Histidine (His)                                            | C4H, ring      | 7.10 (s)  | 119.6 |

|    |                                        |                       |           |       |
|----|----------------------------------------|-----------------------|-----------|-------|
|    |                                        | C2H, ring             | 7.85 (s)  | 138.6 |
| 45 | Uracil                                 | C5H                   | 5.80 (d)  | 103.8 |
|    |                                        | C6H                   | 7.55 (d)  | 146.1 |
| 46 | Myo-inositol                           | C1,3H                 | 3.54 (dd) | 74.1  |
|    |                                        | C2H                   | 4.07 (t)  | 74.0  |
|    |                                        | C4,6 H                | 3.63 (t)  | 74.5  |
|    |                                        | C5H                   | 3.28 (t)  | 76.4  |
| 47 | Carnosine                              | C=CH-N of Histidine   | 7.09 (s)  | 118.5 |
|    |                                        | N=CH-N of Histidine   | 8.08 (s)  | 137.8 |
| 48 | Uridine diphosphate                    | CH <sub>3</sub>       | 2.08 (s)  | 24.9  |
|    | -N-acetylglucosamine                   | CH <sub>2</sub>       | 5.52 (dd) | 97.3  |
| 49 | Dimethylglycine                        | CH <sub>3</sub>       | 2.93 (s)  | ND    |
| 50 | U1                                     | CH <sub>3</sub>       | 2.97 (s)  | ND    |
| 51 | Citrate                                | $\alpha,\gamma$ -CH   | 2.55 (dd) | 48.1  |
|    |                                        | $\alpha',\gamma'$ -CH | 2.67 (dd) | 48.1  |
| 52 | U2                                     |                       | 6.84 (d)  | ND    |
| 53 | Deoxyadenosine<br>monophosphate (dAMP) | 2-CH                  | 8.52 (s)  | ND    |

<sup>a</sup>Multiplicity: s, singlet; d, doublet; t, triplet; q, quartet; dd, doublet of doublets; qu, quintet; m, multiplet; c, complex; br, broad signals. <sup>b</sup>The signals were not determined.

**Table S2.** Composition of fatty acids of BPHs feeding on the resistant and susceptible rice plants ( $\mu\text{mol/g}$ )<sup>a</sup>

|              | <b>R12h<sup>b</sup></b> | <b>S12h<sup>b</sup></b> | <b>R24h</b>      | <b>S24h</b>      | <b>R48h</b>       | <b>S48h</b>        | <b>R96h</b>        | <b>S96h</b>       |
|--------------|-------------------------|-------------------------|------------------|------------------|-------------------|--------------------|--------------------|-------------------|
| C8:0         | 0.016±<br>0.002         | 0.016±<br>0.003         | 0.009±<br>0.002  | 0.015±<br>0.006  | 0.014±<br>0.002   | 0.009±<br>0.001    | 0.005±<br>0.001    | 0.007±<br>0.003   |
| C11:0        | 0.080±<br>0.012         | 0.091±<br>0.013         | 0.091±<br>0.008  | 0.075±<br>0.013  | 0.108±<br>0.010   | 0.101±<br>0.007    | 0.115±<br>0.016    | 0.094±<br>0.011   |
| C12:0        | 0.071±<br>0.022         | 0.131±<br>0.021         | 0.086±<br>0.009  | 0.085±<br>0.012  | 0.129±<br>0.016   | 0.137±<br>0.016    | 0.124±<br>0.025    | 0.108±<br>0.025   |
| C14:0        | 0.683±<br>0.057         | 0.914±<br>0.102         | 0.704±<br>0.078  | 0.723±<br>0.072  | 1.040±<br>0.095   | 0.977±<br>0.118    | 0.989±<br>0.056    | 0.898±<br>0.095   |
| C14:1        | 0.010±<br>0.001         | 0.015±<br>0.002         | 0.011±<br>0.001  | 0.012±<br>0.003  | 0.019±<br>0.002   | 0.018±<br>0.003    | 0.017±<br>0.001    | 0.015±<br>0.001   |
| C15:0        | 0.007±<br>0.001         | 0.005±<br>0.001         | 0.005±<br>0.001  | 0.005±<br>0.001  | 0.009±<br>0.001   | 0.006±<br>0.001    | 0.007±<br>0.001    | 0.005±<br>0.001   |
| C16:0        | 22.988±<br>2.226        | 29.125±<br>3.389        | 24.48±<br>3.192  | 24.227±<br>2.584 | 40.622±<br>2.654  | 41.539±<br>1.528   | 37.947±<br>3.398   | 27.794±<br>2.030  |
| C16:1        | 0.353±<br>0.060         | 0.823±<br>0.114         | 0.421±<br>0.063  | 0.525±<br>0.115  | 0.863±<br>0.101   | 0.732±<br>0.135    | 0.743±<br>0.078    | 0.573±<br>0.068   |
| C18:0        | 6.578±<br>0.983         | 10.100±<br>1.220        | 6.990±<br>0.828  | 7.683±<br>0.975  | 13.421±<br>1.318  | 8.105±<br>0.238    | 12.12±<br>1.338    | 7.246±<br>0.880   |
| C18:<br>1n9  | 23.216±<br>2.427        | 28.483±<br>0.865        | 27.147±<br>2.811 | 26.038±<br>2.902 | 40.694±<br>2.305  | 36.664±<br>1.954   | 35.659±<br>1.657   | 30.678±<br>1.652  |
| C18:<br>2n6  | 22.555±<br>1.462        | 23.269±<br>2.035        | 18.793±<br>1.665 | 20.262±<br>1.553 | 32.189±<br>2.566  | 30.89±1.<br>058    | 25.695±<br>2.877   | 24.299±<br>1.63   |
| C18:<br>3n3  | 0.063±<br>0.004         | 0.060±<br>0.007         | 0.068±<br>0.007  | 0.062±<br>0.005  | 0.064±<br>0.003   | 0.066±<br>0.004    | 0.065±<br>0.002    | 0.060±<br>0.005   |
| C20:0        | 0.062±<br>0.015         | 0.055±<br>0.013         | 0.040±<br>0.008  | 0.066±<br>0.015  | 0.060±<br>0.006   | 0.099±<br>0.019    | 0.084±<br>0.009    | 0.178±<br>0.053   |
| C20:1        | 0.017±<br>0.002         | 0.027±<br>0.003         | 0.020±<br>0.005  | 0.015±<br>0.004  | 0.018±<br>0.002   | 0.022±<br>0.001    | 0.018±<br>0.002    | 0.014±<br>0.002   |
| C20:2        | 0.367±<br>0.031         | 0.304±<br>0.025         | 0.252±<br>0.004  | 0.251±<br>0.026  | 0.370±<br>0.034   | 0.338±<br>0.017    | 0.306±<br>0.001    | 0.281±<br>0.006   |
| C20:<br>3n3  | 0.025±<br>0.004         | 0.041±<br>0.004         | 0.033±<br>0.002  | 0.034±<br>0.004  | 0.044±<br>0.006   | 0.039±<br>0.003    | 0.037±<br>0.003    | 0.027±<br>0.004   |
| ToFA         | 77.021±<br>5.125        | 93.814±<br>9.589        | 80.181±<br>8.252 | 81.203±<br>3.436 | 131.799<br>±7.716 | 112.842<br>±15.591 | 111.544<br>±13.733 | 98.925±<br>10.825 |
| SFA          | 30.455±<br>3.065        | 42.891±<br>3.949        | 33.51±<br>4.981  | 34.833±<br>0.730 | 55.518±<br>2.346  | 50.244±<br>9.576   | 48.184±<br>6.906   | 42.036±<br>5.557  |
| UFA          | 46.565±<br>2.708        | 54.153±<br>4.744        | 46.672±<br>3.660 | 47.292±<br>1.983 | 76.281±<br>5.725  | 66.493±<br>5.642   | 63.037±<br>5.913   | 56.89±<br>5.599   |
| SFA<br>/ToFA | 0.359±<br>0.017         | 0.392±<br>0.006         | 0.379±<br>0.021  | 0.380±<br>0.006  | 0.384±<br>0.011   | 0.392±<br>0.021    | 0.397±<br>0.008    | 0.385±<br>0.014   |

|       |        |        |        |        |        |        |        |        |
|-------|--------|--------|--------|--------|--------|--------|--------|--------|
| UFA   | 0.550± | 0.525± | 0.530± | 0.529± | 0.525± | 0.525± | 0.515± | 0.524± |
| /ToFA | 0.017  | 0.017  | 0.021  | 0.005  | 0.011  | 0.032  | 0.016  | 0.014  |

---

Data expressed as mean  $\pm$  SD. <sup>a</sup> $\mu$ mol per gram BPH fresh weight. <sup>b</sup>R12h and S12h: BPH nymphs feeding on the resistant and susceptible rice plants for 12 hours respectively. Data in red and blue respectively denote significant increase and decrease in BPH feeding on the resistant rice plants compared with these feeding on the susceptible rice plants ( $p < 0.05$ ); ToFA, total fatty acids; SFA, saturated fatty acids; UFA, unsaturated fatty acids.



**Table S3.** Primers for quantitative real-time PCR analysis of selected genes

| Gene Bank<br>Accession | Gene Name                  | Primer sequences (5'-3')                                 | Product<br>length |
|------------------------|----------------------------|----------------------------------------------------------|-------------------|
| KC445137               | <i>Glutamine synthase</i>  | F:TATGCCAGGGATGTGGTTGAG<br>R:CGGTGGAGAAGTTGCAGTGAG       | 265 bp            |
| JQ743627               | <i>Trehalose synthase</i>  | F:TTGCCAAAGACTGAGGCGAATG<br>R:CCTCATCAGCCCAAGGGAACAA     | 196 bp            |
| JQ040014               | <i>Chitin synthase</i>     | F:CCGCAAACGATTCCTACAGA<br>R:AGGTCCTTGACGCTCATTC          | 222 bp            |
| KU365925               | <i>Arginine kinase</i>     | F:ACCACAACGACAACAAGACCTTCC<br>R:TGGGACAGAAAGTCAGGAATCCCA | 186 bp            |
| Li et al.,<br>2016     | <i>Fatty acid Synthase</i> | F:CGGAGACTCTGCCCTAA<br>R:CAGCGACTAATCCAACATC             | 193 bp            |
| Zhai et al.,<br>2013   | 6-Phosphofructokinase      | F:AGGCATCGCCGTCTTCACC<br>R:AGAGCCGTCTCCGCCAATC           | -                 |
| Zhai et al.,<br>2013   | Phospholycerate Kinase     | F:CCCACCACCCCTCAAACCT<br>R:GTCAATGGCGGCCACTAG            | -                 |
| JX125594               | Glutamate Synthase         | F:TTTCGGCCAAAGACAAGCAC<br>R:GGGTCCTTACCGGTGTTCTG         | 223 bp            |
| JX125588               | Asparagine Synthase        | F:TAGGATGCGCTGTGTGGTTT<br>R:GTGTAGCCCCCAAGCAGTTC         | 127 bp            |
| KU196668               | <i>Actin 1</i>             | F:TGGACTTCGAGCAGGAAATGG<br>R:ACGTGCACTTCATGATCGAG        | 199 bp            |
